# Supplementary material for: Sequence and Structure Characteristics of 22 Deletion Breakpoints in Intron 44 of the DMD Gene Based on Long-Read Sequencing
Source: Front Genet. 2021 Apr 30;12:638220. doi: 10.3389/fgene.2021.638220 (PMC8240811; doi:10.3389/fgene.2021.638220)
Supplement: Supplementary file 2 [file Table_2.xlsx]

## Sheet: Sheet1
Supplementary table 2. The sequencing depth of each genomic region of 22 samples
SampleID	gene	UTR	exon79	intron78	exon78	intron77	exon77	intron76	exon76	intron75	exon75	intron74	exon74	intron73	exon73	intron72	exon72	intron71	exon71	intron70	exon70	intron69	exon69	intron68	exon68	intron67	exon67	intron66	exon66	intron65	exon65	intron64	exon64	intron63	exon63	intron62	exon62	intron61	exon61	intron60	exon60	intron59	exon59	intron58	exon58	intron57	exon57	intron56	exon56
N1	398.86	509.16	494.27	498.67	410.94	521.61	371.8	408.25	363.52	430.46	497.47	469.09	520.19	489.16	485.25	522.62	544.18	522.97	486.34	453.47	476.48	527.29	567.18	497.87	454.27	405.59	498.73	524.5	588.22	558.67	542.29	413.2	398.93	435.75	538.18	482.89	532.05	409.79	499.51	376.55	681.92	366.96	477.84	462.7	448.73	416.06	574.27	470.05	499.19
N2	301.43	448.87	419.73	378.39	330.68	361.42	289.52	329.41	289.72	331.22	325.72	368.65	399.82	441.95	417.63	436.49	441.22	449.94	422.74	399.67	385.1	408.11	417.2	369.37	335.2	299.39	313.02	344.52	344.48	426.64	430.22	338.06	328.36	324.08	417.15	363.31	454.27	340.87	410.37	300.03	412.9	282.01	472.43	415.53	383.46	331.64	352.74	378.84	380.7
N3	191.61	324.09	324.55	290.04	285.65	272.84	255.48	244.6	204.07	244.95	265.19	284.11	288.73	290.02	264.54	273.44	272.37	294.45	392.66	337.18	337.35	294.76	249.12	245.44	250.13	214.99	233.92	272	238.05	268.6	282.32	259.52	226.01	243.48	315.59	259.14	314.97	231.87	255.86	214.34	319.32	200.55	298.39	266.05	243.32	214	369.01	119.14	25.93
N4	551.48	670.23	653.64	624.39	611	676.86	591.73	562.16	503.5	570.11	520.74	565.23	661.61	683.04	635.4	603.93	507.02	696.64	854.47	759.89	795.98	750.31	757.08	699.8	561.48	497.62	552.57	540.69	592.39	608.15	656.17	614.86	510.7	570.99	713.77	623.08	747.97	578.79	664.62	501.68	697.27	472.05	648.75	593.78	562.73	510.75	768.58	648.01	614.38
N5	164.59	216.29	209.55	201.46	201.35	210.1	192.87	183.83	168.88	174.64	195.4	196.77	210.29	230.33	232.08	221.06	184.72	238.62	294.84	266.36	290.75	263.69	223.95	219.02	191.93	174.63	151.75	193.64	226.19	205	221.49	194.04	168.54	181.29	290.93	201.69	223.07	181.69	211.6	155.88	222.41	156.97	206.44	196.21	188.45	168.09	200.26	212.54	196.9
N6	678.9	790.1	853.09	728.18	766.26	795.43	718.36	727.43	674.69	761.67	800.92	675.98	742.98	786.91	852.08	890.99	826.18	824.25	832.68	817.07	848.6	829.66	746.34	684.72	677.28	602.12	718.71	686.81	730.22	759.13	819.48	687.58	754.27	680.92	883.87	756.41	846.93	690.27	696.91	596.54	833.47	565.31	764.82	741.86	671.39	644.29	723.53	794.81	767.62
N7	245.29	319.27	294.18	297.86	350.74	301.11	216.21	238.51	232.36	273.46	266.17	281.84	281.99	306.21	373.12	383.59	318.94	350.66	370.55	347.28	340.73	304.22	278.68	254.89	225.47	240.24	226.69	247.83	271.02	311.79	372.26	243.48	298.11	246.89	279.02	276.9	310.82	263.73	327.73	228.82	300.91	222.6	321.32	280.17	267.66	250.64	295.49	291.09	281.44
N8	458.76	592.46	538.27	570.81	565.94	606.59	475.55	541.05	498.84	524.38	584.19	531.89	577.97	563.7	527.32	567.7	578.97	575.16	684.61	680.37	675.27	555.24	522.08	532.38	487.8	480.15	568.15	534.81	601.79	625.14	644.87	542.26	439.85	493.35	557.56	562.34	619.28	496.22	607.64	448.55	565.96	402.8	551.47	606.02	606.96	496.4	635.54	512.5	500.59
N9	289.91	395.95	439.82	410.71	329.45	350.84	340.68	321.56	333.46	314.86	348.95	345.18	337.34	356.66	334.98	311.81	290.63	371.52	379.89	370.93	373.04	394.53	449.29	434.06	383.46	300.21	291.22	338.7	366.14	364.77	333.69	321.2	346.62	303.86	376.1	350.44	392	300.91	399.18	285.21	373.22	276.32	324.77	294	264.14	288.5	416.21	351.47	304.26
N10	467.03	651.06	536.55	550.85	565.94	552.42	489.75	571.22	543.7	594.14	628.53	585.81	711.06	677.85	753.78	744.99	709.29	689.39	665.68	635.52	661.11	690.53	694.58	651.04	672.27	495.92	558.02	658.46	703.67	686.51	728.17	555.22	543.24	553.58	641.69	600.03	737.42	543.79	675.54	487.26	664.17	467.35	625.01	652.82	630.25	535.3	662.96	608.81	572.92
N11	74.77	103.25	105.18	93.16	86.29	85.98	71.41	80.17	54.37	60.21	84.01	77.71	97.1	92.8	84.98	104.54	114.97	76.54	63.55	69.26	85.79	87.22	87.99	102.97	87.66	70.79	84.64	73.69	88.94	99.18	102.32	79.78	85.47	83.72	112.43	82.09	78.9	71.57	82.42	67.2	113.17	65.78	94.74	85.7	75.15	62.06	97.86	91.16	68.13
N12	130.56	169.04	156	145.83	178.03	139.98	107.91	121.04	141.85	166.87	177.65	140.15	173.09	185.75	221.65	191.49	165.52	137.19	148.89	136.24	148.21	149.06	132.15	159.89	149.6	120.93	124.85	137.98	143.45	156.19	141.02	124.48	132.23	119.67	133.15	142.04	188	129.99	139.18	112.92	135.47	101.26	156.44	128.43	119.03	128.19	167.36	145.55	185.13
N13	625.88	781.57	760.91	759.54	769.13	777.34	619.45	650.56	637.47	731.9	772.33	725.27	918.75	831.48	856.38	889.61	821.18	906.23	938	897.97	967.87	962.62	927.14	870.32	793.93	615.2	700.54	744.13	882.96	931.88	900.27	677.55	662.47	677.69	927.1	747.17	760.88	653.13	700.1	604.39	739.39	540.84	802.13	747.53	688.88	643.81	860.12	710.1	652.56
N14	234.43	325.98	313.18	311.53	354.29	306.11	241.32	283.23	256.27	274.19	296.47	302.43	403.27	360.72	338.74	309.7	283.26	346	374.68	354.36	322.26	340.36	325.15	303.63	254.98	253.92	285.25	283.26	311.55	340.72	318.17	277.99	228.91	276.23	343.72	314	404.92	283.15	292.55	249.84	321.79	232.6	314.09	294.52	277.52	253.44	333.21	310.28	293.47
N15	191.34	218.4	215.82	235.38	259.23	243.74	213.3	214.05	158.72	184.4	202.02	219.06	233.64	237.13	262.98	258.49	236.54	268.4	318.53	280.1	260.68	247.77	240.56	255.57	255.75	175.15	197.64	220.32	247.86	273.01	320.96	218.09	166.7	198.95	320.39	225.76	288.9	197.05	269.74	180.5	230.88	160.05	194.84	195.76	196.88	177.83	248.65	218.55	210.36
N16	141.26	174.92	173.45	192.58	216.35	183.54	128.54	162.08	150.52	181.29	213.18	174.78	191.89	193.27	190.52	189.85	169.14	193.81	260.11	227.48	209.79	217.65	229.95	224.3	183.96	143.02	156.19	178.11	167.92	224.39	204.63	166.53	154.35	165.76	212.97	173.99	220.42	162.31	209.36	142.51	176.23	123.66	185.75	163.5	146.62	145.85	188.34	178.19	159.5
N17	106.37	169.27	176.36	168.94	149.35	143.72	131.28	123.05	108.83	113.91	115.78	134.62	135.77	151.69	175.94	185.25	169.55	172.82	182.39	170.39	161.2	170.39	193.28	159.46	124.68	114.59	137.63	150.14	164.93	159.75	160.4	139.05	108.55	120.96	150	138.89	125.23	121.16	133.64	101.94	125.52	96.28	135.46	133.29	120.26	111.32	160.87	132.35	117.77
N18	118.1	173.42	168.64	170.5	167.48	161.01	110.57	134.97	128.39	149.31	148.45	135.42	141.71	145.58	152.94	161.24	174.35	179.78	180.55	185.4	169.26	180.96	203.68	157.64	147.18	132.61	127.9	120.93	130.53	172.64	184.47	138.21	121.14	130.41	172.26	148.92	129.23	135.9	147.01	116.53	179.05	112.87	136.42	130.36	134.88	127.96	167.61	153.29	159.94
N19	112.67	158.99	180.73	173.02	176.16	165.01	133.75	134.1	119.01	126.56	136.02	138.95	157.63	146.37	145.83	160.74	169.75	183.37	220.42	204.08	194.53	160.7	133.77	148.34	124.52	111.28	108	121.53	156.79	166.65	150.69	136.83	117.43	126.63	158.57	134.6	156.78	126.63	182.24	111.96	155.49	104.51	150.16	141.61	139.23	112.92	147.57	139.93	143.97
N20	264.47	350.66	311.36	326.03	337.32	325.24	195.73	248.9	243.9	297.4	333.16	327.79	304.78	371.77	384.78	365.84	332.08	351.58	411.82	372.61	393.62	350.08	384.51	355.58	299.49	237.42	233.56	270.01	367.2	376.38	410.56	277.54	211.54	266.97	406.08	294.76	337.12	260.12	343	227.24	313.95	217.2	334.9	312.12	274.67	245.89	363.67	309.36	342.45
N21	372.64	500.22	485.09	453.4	496.94	447.16	271.91	326.26	317.99	387.97	449.78	426.32	517.1	544.57	565.22	539.75	455.92	492.16	558.45	505.09	497.76	520.93	528.6	475.09	368.95	328.53	337.17	362.31	434.59	509.55	498.68	365.28	292.34	356.03	523.26	399.84	403.62	358.71	434.05	311.46	473.47	303.51	510.81	474.91	429.91	330.3	521.04	413.93	438.42
N22	583.19	791.36	707.27	728.5	730.19	717.19	546.58	595.91	491.9	657.11	787.35	706.87	739.86	757.78	763.18	802.67	744.88	787.79	856.82	779.22	820.28	762.77	850.77	781.21	655.89	547.43	622.41	656.87	792.45	813.91	793.71	616.76	483.86	588.3	838.82	684.49	771.7	595.93	742.21	524.04	883.1	505.42	743.9	668.89	600.72	521.43	807.16	665.82	729.52
[truncated: 111 more columns]
